# Supplementary material for: The Effect of SBAR Communication on Nurse Attitude and Behavior in Increasing Patient Safety in KRMT Wongsonegoro Hospital, Semarang
Source: Research Square preprint supplement (doi:10.21203/rs.3.rs-1117819/v1), 2021-12-14
Supplement: Supplementary file 1 [file b6fa770990e4ba7eb5c50d8a.xlsx]

## Sheet: Sheet1
No	Name	Attitude Score (PRETEST)	Attitude Score (POSTTEST)	Behavior Score (PRETEST)	Behavior Score (POSTTEST)
1		45	53	52	63
2		45	60	50	72
3		49	55	62	65
4		52	52	56	63
5		62	59	61	69
6		56	66	62	64
7		55	59	63	63
8		64	55	65	66
9		52	49	53	55
10		52	52	53	53
11		56	53	61	64
12		56	56	62	62
13		57	55	60	65
14		54	57	60	60
15		51	58	55	57
16		51	55	56	62
17		58	58	65	65
18		54	61	59	70
19		55	60	61	55
20		55	61	60	56
21		49	57	52	54
22		50	59	71	64
23		53	51	63	63
24		53	55	63	63
