# Supplementary material for: The Effect of SBAR Communication on Nurse Attitude and Behavior in Increasing Patient Safety in KRMT Wongsonegoro Hospital, Semarang
Source: Research Square preprint supplement (doi:10.21203/rs.3.rs-1117819/v1), 2021-12-14
Supplement: Supplementary file 2 [file c88f6f84f79f2d2f15fd4251.xlsx]

## Sheet: Sheet1
No	Name	Attitude Score (PRETEST)	Attitude Score (POSTTEST)	Behavior Score (PRETEST)	Behavior Score (POSTTEST)
1		47	49	57	55
2		53	53	66	66
3		49	52	57	56
4		49	52	52	52
5		50	54	61	63
6		51	54	64	65
7		55	55	66	67
8		51	51	63	63
9		48	49	54	54
10		49	48	55	54
11		52	52	54	52
12		54	50	54	53
13		59	58	58	64
14		59	57	58	64
15		51	59	56	55
16		51	59	55	60
17		54	56	59	58
18		52	52	60	57
19		52	52	61	61
20		54	59	61	60
21		47	47	53	54
22		48	48	55	54
23		58	51	70	67
24		61	62	68	64
